# Supplementary material for: Learning how to robustly estimate camera pose in endoscopic videos
Source: Springer Nature journal article supplement (doi:10.1007/s11548-023-02919-w), 2023-05-15
Supplement: MOESM1 [file 25364534]

# Learning How To Robustly Estimate Camera Pose in Endoscopic Videos

Michel Hayoz<sup>1\*</sup>, Christopher Hahne<sup>1</sup>, Mathias Gallardo<sup>1</sup>, Daniel Candinas<sup>2</sup>, Thomas Kurmann<sup>3</sup>, Maximilian Allan<sup>3</sup> and Raphael Sznitman<sup>1</sup>

<sup>1</sup>ARTORG Center, University of Bern, Switzerland.

<sup>2</sup>Dept. of Visceral Surgery and Medicine, Inselspital, Switzerland.

<sup>3</sup> Applied Research, Intuitive Surgical, USA.

\*Corresponding author(s). E-mail(s): [michel.hayoz@unibe.ch](mailto:michel.hayoz@unibe.ch);

## Appendix A StereoMIS dataset

2 *Robust Camera Pose Estimation for Endoscopic Videos*

**Table A1** Details on StereoMIS dataset. Sequences are denoted  $x_y$  where  $x$  is the subject and  $y$  the sequence number. *length* denotes the total trajectory length of the sequence in millimeters. Number of sequences are reported for the surgical scenarios experiment in the format: total (*breathing, scanning, deforming*).

|      | subject | duration  | length | fps orig | fps at test-time | split | #sequence    |
|------|---------|-----------|--------|----------|------------------|-------|--------------|
| H1.0 | human   | 32min 01s | 3516   | 60.0     | 30.0             | train | -            |
| H2.0 | human   | 3min 10s  | 116    | 60.0     | 30.0             | test  | 7 (5, 1, 1)  |
| H2.1 | human   | 50s       | 424    | 60.0     | 30.0             | test  | 0 (0, 0, 0)  |
| H2.2 | human   | 48s       | 97     | 60.0     | 30.0             | test  | 1 (0, 0, 1)  |
| H3.0 | human   | 5min 19s  | 781    | 60.0     | 30.0             | test  | 6 (5, 1, 0)  |
| P1.0 | porcine | 5min 19s  | 1323   | 60.0     | 30.0             | train | -            |
| P2.0 | porcine | 3min 28s  | 434    | 52.6     | 26.3             | test  | 8 (4, 4, 0)  |
| P2.1 | porcine | 2min 36s  | 1155   | 54.4     | 27.2             | test  | 8 (0, 8, 0)  |
| P2.2 | porcine | 2min 37s  | 736    | 54.4     | 27.2             | test  | 10 (0,10, 0) |
| P2.3 | porcine | 2min 35s  | 302    | 54.4     | 27.2             | test  | 4 (0, 4, 0)  |
| P2.4 | porcine | 2min 37s  | 1824   | 54.4     | 27.2             | test  | 9 (0, 9, 0)  |
| P2.5 | porcine | 3min 18s  | 1671   | 54.2     | 27.1             | test  | 15 (0,15, 0) |
| P2.6 | porcine | 52s       | 205    | 26.1     | 26.1             | test  | 1 (0, 1, 0)  |
| P2.7 | porcine | 2min 26s  | 725    | 37.0     | 37.0             | test  | 3 (2, 1, 0)  |
| P2.8 | porcine | 3min 55s  | 950    | 39.0     | 39.0             | test  | 6 (0, 6, 0)  |
| P3.0 | porcine | 2min 58s  | 545    | 60.0     | 30.0             | test  | 8 (1, 0, 7)  |

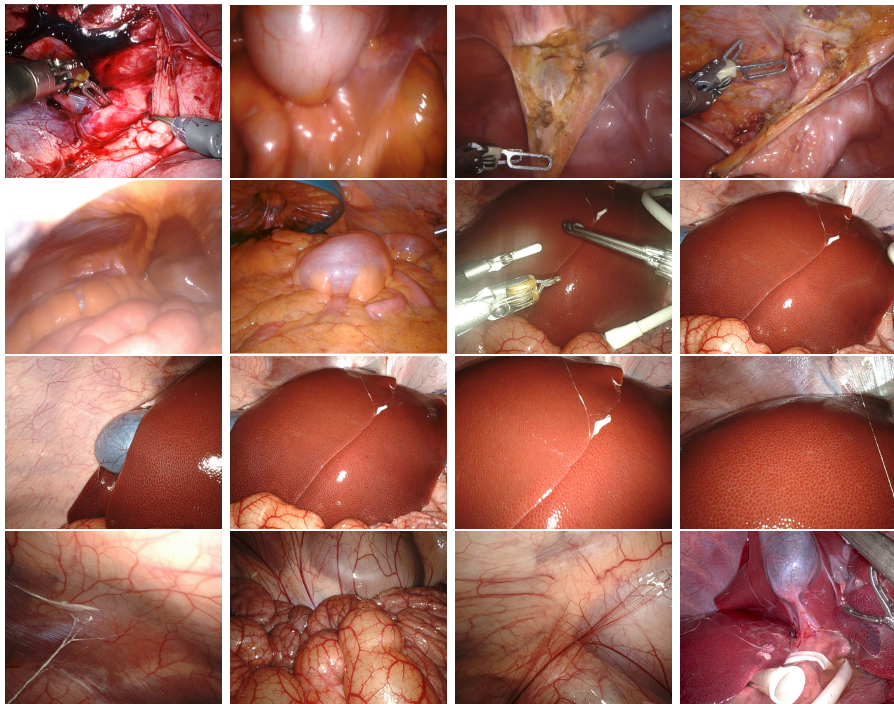

**Fig. A1** Example images from StereoMIS sequences. Same order as in table A1 from top left to bottom right.

## Appendix B StereoMIS test set trajectories

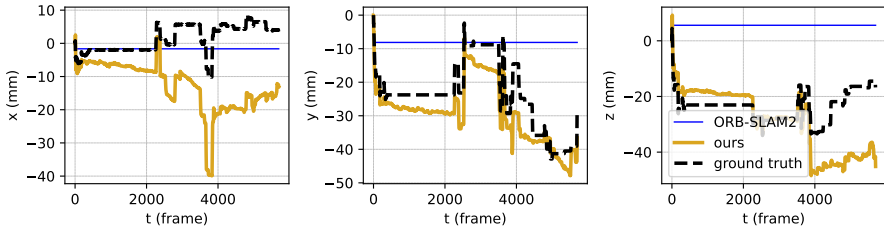

**Fig. B2** Trajectory of *StereoMIS* H2.0 (ATE-RMSE 11.3mm).

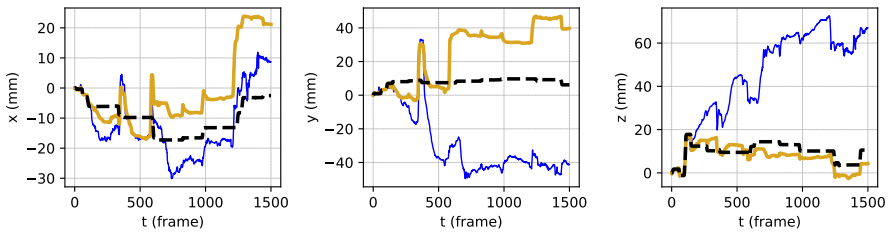

**Fig. B3** Trajectory of *StereoMIS* H2.1 (ATE-RMSE 18.8mm).

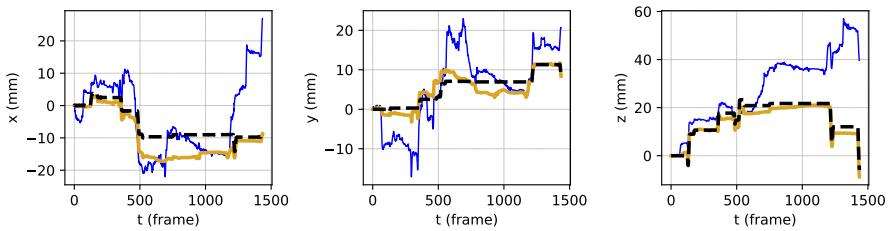

**Fig. B4** Trajectory of *StereoMIS* H2.2 (ATE-RMSE 2.6mm).

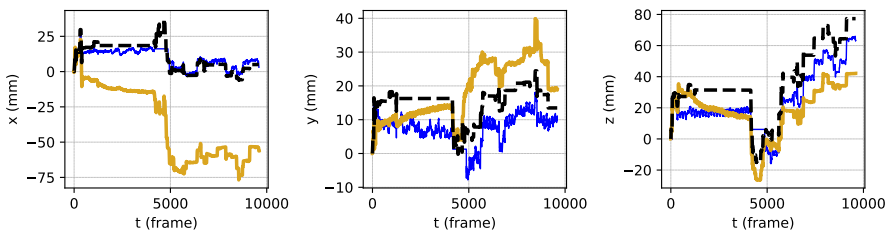

**Fig. B5** Trajectory of *StereoMIS* H3.0 (ATE-RMSE 21.2mm).

## 4 Robust Camera Pose Estimation for Endoscopic Videos

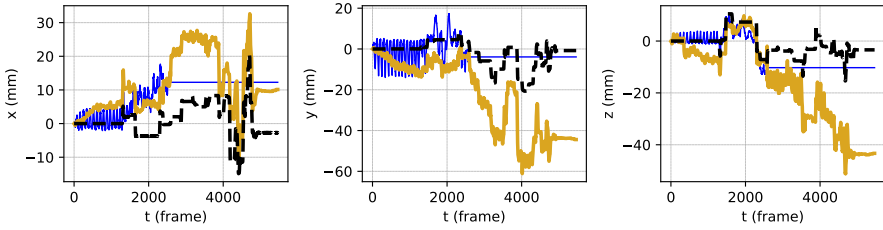

**Fig. B6** Trajectory of *StereoMIS* P2.0 (ATE-RMSE 20.5mm).

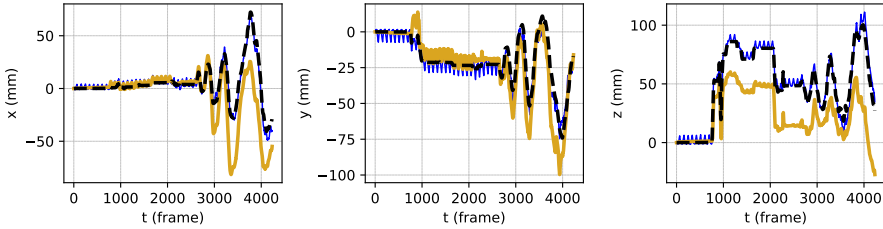

**Fig. B7** Trajectory of *StereoMIS* P2.1 (ATE-RMSE 24.2mm).

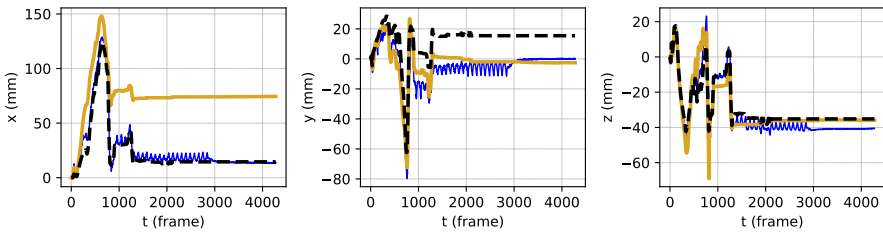

**Fig. B8** Trajectory of *StereoMIS* P2.2 (ATE-RMSE 12.8mm).

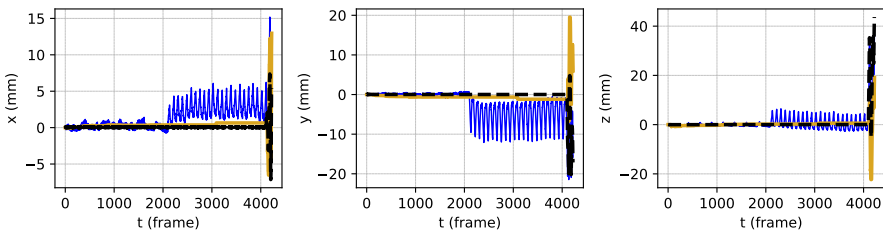

**Fig. B9** Trajectory of *StereoMIS* P2.3 (ATE-RMSE 4.3mm).

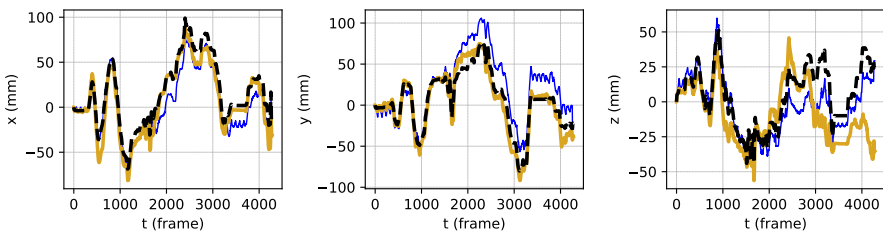

**Fig. B10** Trajectory of *StereoMIS* P2.4 (ATE-RMSE 15.1mm).

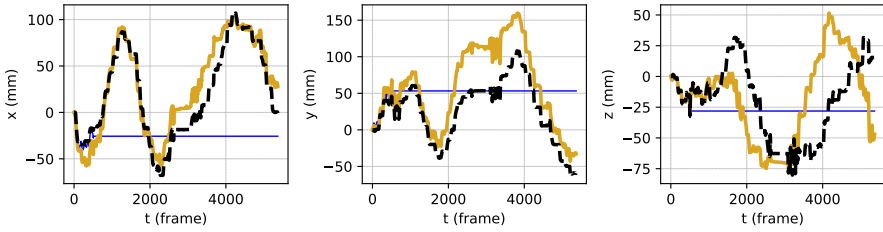

**Fig. B11** Trajectory of *StereoMIS* P2.5 (ATE-RMSE 22.7mm).

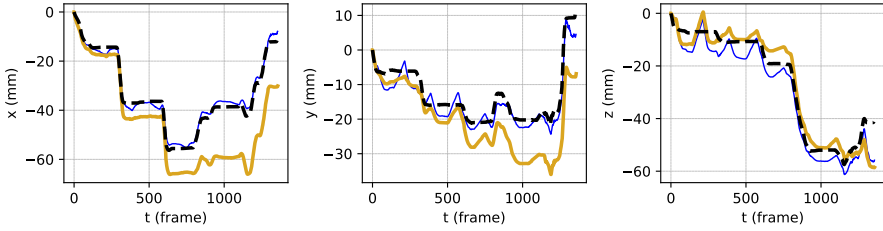

**Fig. B12** Trajectory of *StereoMIS* P2.6 (ATE-RMSE 5.4mm).

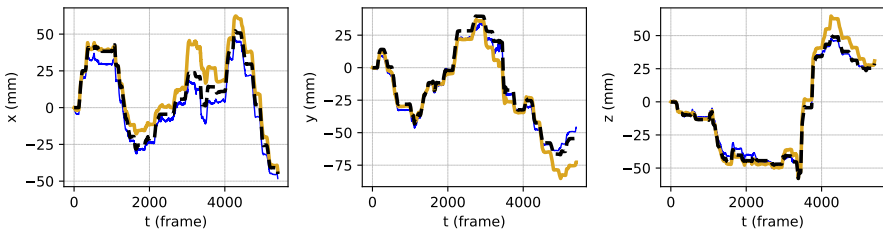

**Fig. B13** Trajectory of *StereoMIS* P2.7 (ATE-RMSE 9.3mm).

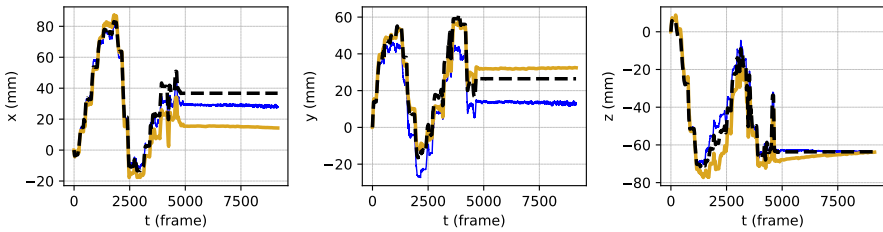

**Fig. B14** Trajectory of *StereoMIS* P2.8 (ATE-RMSE 10.2mm).

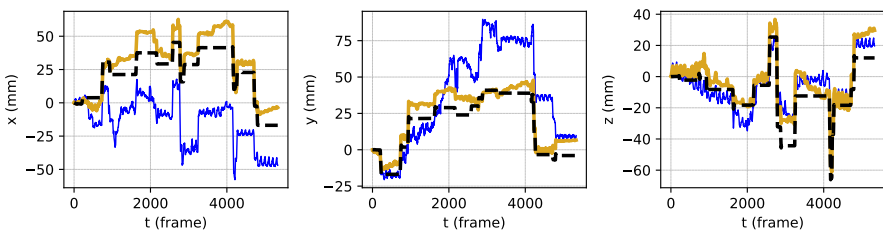

**Fig. B15** Trajectory of *StereoMIS* P3.0 (ATE-RMSE 8.8mm).

## Appendix C Results on full StereoMIS sequences

**Table C2** Pose estimation results on full StereoMIS test sequences for ORB-SLAM2, ElasticFusion, and **ours**. **Frames where SLAM methods fail to estimate the pose are removed from the evaluation.** The success ratio is the ratio of frames where the SLAM method estimates the pose over the total number of frames. Metrics are reported in (mean $\pm$ std) when applicable.

|                | H2                                | H3                                | P2                                | P3                                | macro avg.                        |
|----------------|-----------------------------------|-----------------------------------|-----------------------------------|-----------------------------------|-----------------------------------|
| Success Ratio  |                                   |                                   |                                   |                                   |                                   |
| ORB-SLAM2      | 0.34                              | 0.93                              | 0.82                              | 1.0                               | 0.77 $\pm$ 0.3                    |
| ElasticFusion  | 0.99                              | 1.0                               | 1.0                               | 1.0                               | 1.0 $\pm$ 0.0                     |
| <b>ours</b>    | 1.0                               | 1.0                               | 1.0                               | 1.0                               | 1.0 $\pm$ 0.0                     |
| ATE-RMSE (mm)  |                                   |                                   |                                   |                                   |                                   |
| ORB-SLAM2      | 14.3                              | <b>4.4</b>                        | <b>8.4</b>                        | 21.4                              | <b>12.1 <math>\pm</math> 7.4</b>  |
| ElasticFusion  | 30.8                              | 72.1                              | 32.9                              | 37.7                              | 43.4 $\pm$ 19.4                   |
| <b>ours</b>    | <b>10.9</b>                       | 21.2                              | 13.8                              | <b>8.8</b>                        | 13.7 $\pm$ 5.4                    |
| RPE-trans (mm) |                                   |                                   |                                   |                                   |                                   |
| ORB-SLAM2      | 0.46 $\pm$ 0.53                   | 0.24 $\pm$ 0.25                   | 0.40 $\pm$ 0.49                   | 0.54 $\pm$ 0.47                   | 0.41 $\pm$ 0.16                   |
| ElasticFusion  | 0.87 $\pm$ 1.11                   | 0.56 $\pm$ 1.03                   | 0.83 $\pm$ 1.13                   | 0.71 $\pm$ 0.79                   | 0.74 $\pm$ 0.12                   |
| <b>ours</b>    | <b>0.10 <math>\pm</math> 0.27</b> | <b>0.10 <math>\pm</math> 0.18</b> | <b>0.16 <math>\pm</math> 0.32</b> | <b>0.19 <math>\pm</math> 0.31</b> | <b>0.14 <math>\pm</math> 0.04</b> |
| RPE-rot (deg)  |                                   |                                   |                                   |                                   |                                   |
| ORB-SLAM2      | 0.39 $\pm$ 0.43                   | 0.16 $\pm$ 0.22                   | 0.25 $\pm$ 0.34                   | 0.28 $\pm$ 0.27                   | 0.27 $\pm$ 0.06                   |
| ElasticFusion  | 0.73 $\pm$ 1.06                   | 0.41 $\pm$ 0.96                   | 0.60 $\pm$ 1.15                   | 0.38 $\pm$ 0.40                   | 0.53 $\pm$ 0.13                   |
| <b>ours</b>    | <b>0.04 <math>\pm</math> 0.20</b> | <b>0.04 <math>\pm</math> 0.13</b> | <b>0.07 <math>\pm</math> 0.14</b> | <b>0.05 <math>\pm</math> 0.10</b> | <b>0.05 <math>\pm</math> 0.01</b> |

## Appendix D SCARED test set trajectories

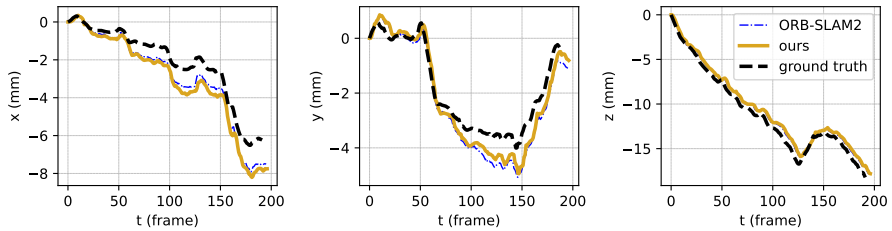

**Fig. D16** Trajectory of *SCARED* d1.k1 (ATE-RMSE 0.47mm).

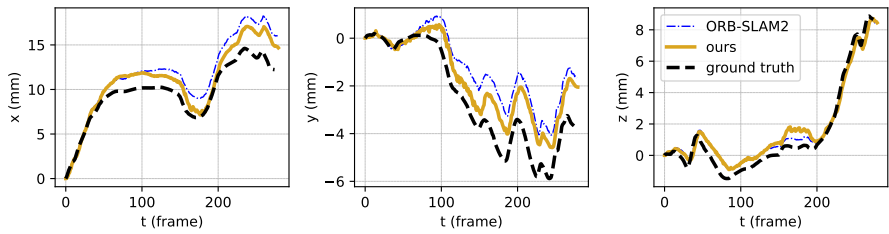

**Fig. D17** Trajectory of *SCARED* d1.k2 (ATE-RMSE 0.37mm).

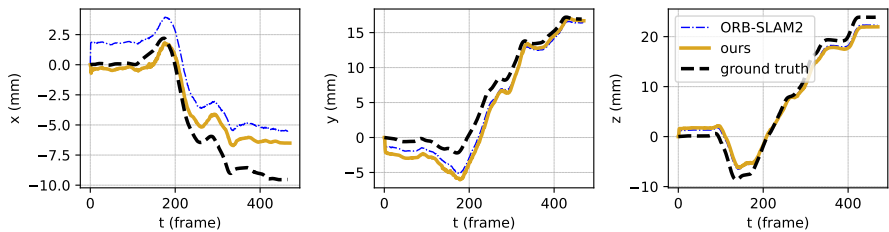

**Fig. D18** Trajectory of *SCARED* d1.k3 (ATE-RMSE 1.05mm).

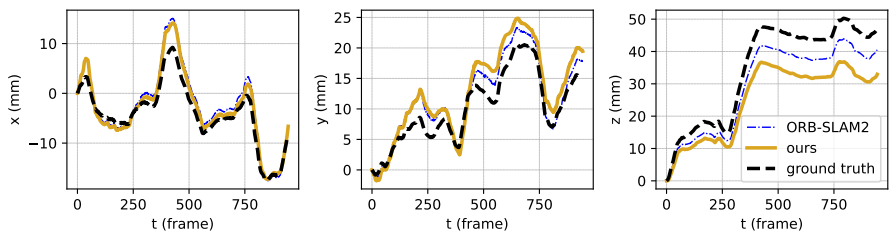

**Fig. D19** Trajectory of *SCARED* d8.k0 (ATE-RMSE 3.53mm).

## 8 Robust Camera Pose Estimation for Endoscopic Videos

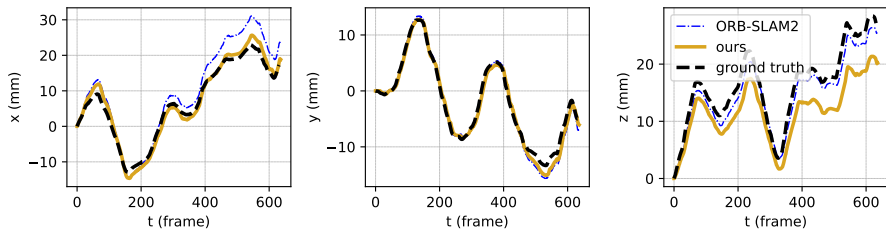

**Fig. D20** Trajectory of *SCARED* d8\_k1 (ATE-RMSE 2.08mm).

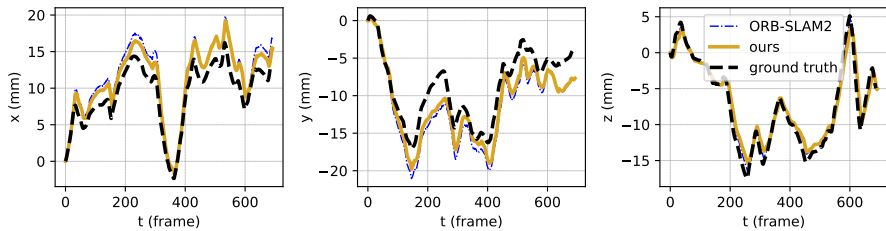

**Fig. D21** Trajectory of *SCARED* d8\_k2 (ATE-RMSE 1.20mm).

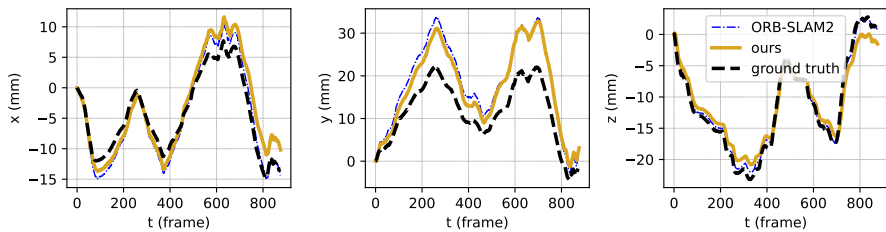

**Fig. D22** Trajectory of *SCARED* d8\_k3 (ATE-RMSE 1.92mm).

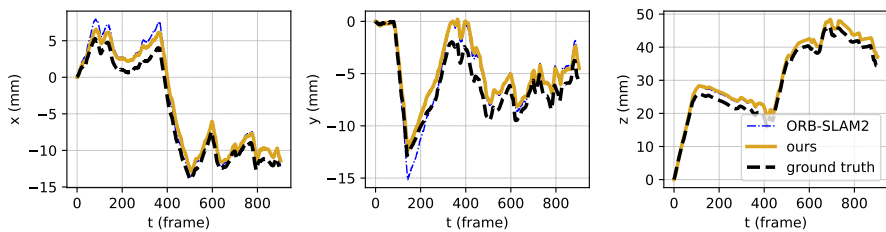

**Fig. D23** Trajectory of *SCARED* d9\_k0 (ATE-RMSE 0.77mm).

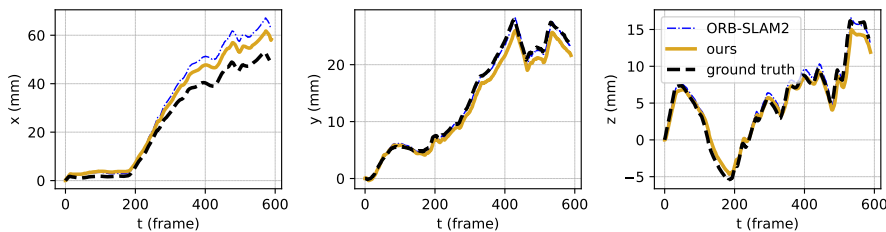

**Fig. D24** Trajectory of *SCARED* d9\_k1 (ATE-RMSE 2.04mm).



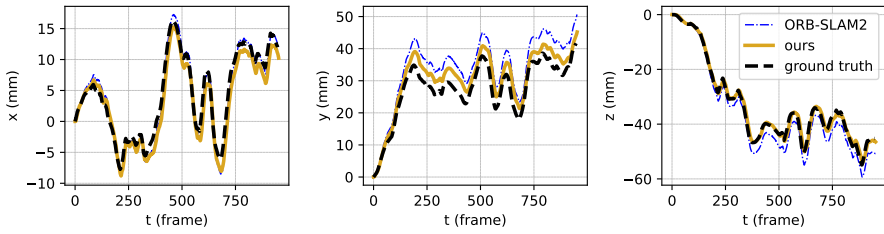

**Fig. D25** Trajectory of *SCARED* d9\_k2 (ATE-RMSE 0.96mm).

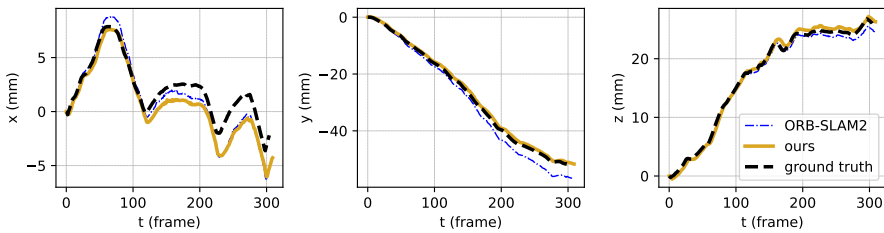

**Fig. D26** Trajectory of *SCARED* d9\_k3 (ATE-RMSE 0.84mm).
